# Supplementary material for: Discovery of gene regulatory elements through a new bioinformatics analysis of haploid genetic screens
Source: PubMed Central journal article supplement (PMC6350973; doi:10.1371/journal.pone.0198463), 2019-01-29

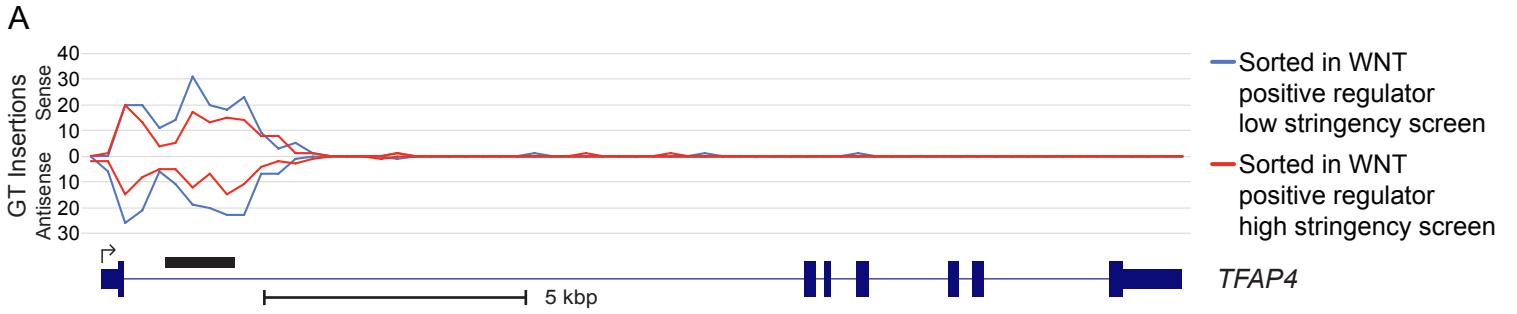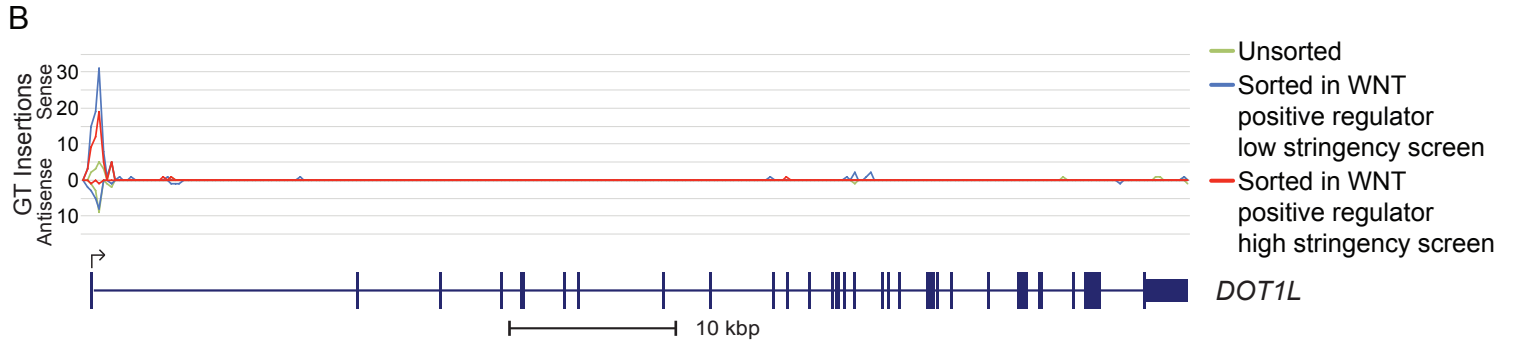

Supplement: pone.0198463.s002.pdf [file pone.0198463.s002.pdf]
