# Supplementary material for: Discovery of gene regulatory elements through a new bioinformatics analysis of haploid genetic screens
Source: PLoS One. 2019 Jan 29;14(1):e0198463. doi: 10.1371/journal.pone.0198463 (PMC6350973; doi:10.1371/journal.pone.0198463)
Supplement: S2 File — The genomic sequences flanking GT insertion sites in the clonal cell lines used in this study are described. The first column (“Clone Name”) indicates the names of the clonal cell lines and the second column (“Genomic sequence flanking GT”) indicates the genomic sequences 5’ and 3’ from the GT insertion site (relative to the sense orientation of the GT as described in Fig 1). (XLSX) [file pone.0198463.s005.xlsx]

## Sheet: Sheet1
Clone Name	Insertion site- HGVS Nomenclature	Genomic sequence flanking GT
TFAP4GT	NC_000016.13:g.4271036_4271037insGenetrap (Dec.2013: hg38, GRCh38)	5- GCAAAGTGAGTCCCCAGAACATA[genetrap]AAAAGAGCTCAAGAATTTTTTTTACTTATTATTACTGGGCCCTCCAGGTGG-3
LRP6GT-1(Up)	NC_000012.13:g.12268371_12268372insGenetrap (Dec.2013: hg38, GRCh38)	5’- GCAGGTTTGTAAGTAGATGGACAGCAGAAACAGCCAAATCA[gene trap]CTTTCTCCCAAATTCACCTGAGGTCTAGTCACCGTTTATTTAAATGACCTGCTTCTAAGAACCAAGTGAGTTTTGTATTCTGGCTTCCTCAAAGCAGGAAA-3’
LRP6GT-2(Up)	NC_000012.13:g.12269383_12269384insGenetrap (Dec.2013: hg38, GRCh38)	5’-ATATTACACACTGCTGAAAAATAATAATTTAGAGGATTA[gene trap]TGCAACAGTGTTGAATGTTTATAGTGAGTTAAGCTTTTTTTTTTTTTTTTTTTTTTT-3’
LRP6GT-3(Int)	NC_000012.13:g.12266072_12266073insGenetrap (Dec.2013: hg38, GRCh38)	5’- GTTATAGGTCGAGCGTTTCAGCATTGGGAGCCTTCTGAGCTTCA[gene trap]GCCCATAATAAAATAAAACATTGCCCTTGTAACCTCTGGTATTCACGGCTTGCCCCTATTTTCGGAGTATGCAAGTGTAC-3’
